# Supplementary material
Source: MDPI journal article supplement (https://www.mdpi.com/search?q=plants-09-00044)
Supplement: s001 [file plants-09-00044-s001.pdf]

**Supplemental material:** A listing of 289 medicinal plants used by the Maasai as documented in 19 references reviewed [9,13,14,16–31]. The species are sorted by the number of use reports for each of them. The plant families (in parenthesis) are those each species is assigned to in *The Plant List*.

| <b>Medicinal plants and Families</b>                                       | <b>Use reports</b> |
|----------------------------------------------------------------------------|--------------------|
| <i>Warburgia ugandensis</i> Sprague (Canellaceae)                          | 57                 |
| <i>Acacia nilotica</i> (L.) Delile (Leguminosae)                           | 52                 |
| <i>Solanum incanum</i> L. (Solanaceae)                                     | 51                 |
| <i>Salvadora persica</i> L. (Salvadoraceae)                                | 41                 |
| <i>Rhamnus prinoides</i> L'Hér. (Rhamnaceae)                               | 38                 |
| <i>Albizia anthelmintica</i> Brongn. (Leguminosae)                         | 34                 |
| <i>Carissa spinarum</i> L. (Apocynaceae)                                   | 29                 |
| <i>Acacia mellifera</i> (M.Vahl) Benth. (Leguminosae)                      | 29                 |
| <i>Warburgia salutaris</i> (G.Bertol.) Chiov. (Canellaceae)                | 25                 |
| <i>Vepris simplicifolia</i> (Engl.) Mziray (Rutaceae)                      | 25                 |
| <i>Toddalia asiatica</i> (L.) Lam. (Rutaceae)                              | 25                 |
| <i>Tarchonanthus camphoratus</i> L. (Asteraceae)                           | 25                 |
| <i>Rhamnus staddo</i> A.Rich. (Rhamnaceae)                                 | 25                 |
| <i>Zanthoxylum usambarense</i> (Engl.) Kokwaro (Rutaceae)                  | 24                 |
| <i>Pappea capensis</i> Eckl. & Zeyh. (Sapindaceae)                         | 24                 |
| <i>Lippia javanica</i> (Burm.f.) Spreng. (Verbenaceae)                     | 24                 |
| <i>Acacia xanthophloea</i> Benth. (Leguminosae)                            | 24                 |
| <i>Kigelia africana</i> (Lam.) Benth. (Bignoniaceae)                       | 23                 |
| <i>Euclea divinorum</i> Hiern (Ebenaceae)                                  | 23                 |
| <i>Rotheca myricoides</i> (Hochst.) Steane & Mabb. (Lamiaceae)             | 22                 |
| <i>Olea europaea</i> L. (Oleaceae)                                         | 22                 |
| <i>Ximenia americana</i> L. (Olacaceae)                                    | 21                 |
| <i>Searsia natalensis</i> (Bernh. ex C.Krauss) F.A.Barkley (Anacardiaceae) | 21                 |
| <i>Tamarindus indica</i> L. (Leguminosae)                                  | 18                 |
| <i>Combretum molle</i> R.Br. ex G.Don (Combretaceae)                       | 18                 |
| <i>Myrsine africana</i> L. (Primulaceae)                                   | 17                 |
| <i>Baccharoides lasiopus</i> (O.Hoffm.) H.Rob. (Asteraceae)                | 17                 |
| <i>Artemisia afra</i> Jacq. ex Willd. (Asteraceae)                         | 16                 |
| <i>Acacia tortilis</i> (Forssk.) Hayne (Leguminosae)                       | 15                 |
| <i>Acacia drepanolobium</i> Sjostedt (Leguminosae)                         | 15                 |
| <i>Euphorbia candelabrum</i> Trémaux ex Kotschy (Euphorbiaceae)            | 14                 |
| <i>Acacia oerfota</i> (Forssk.) Schweinf. (Leguminosae)                    | 14                 |
| <i>Grewia damine</i> Gaertn. (Malvaceae)                                   | 13                 |
| <i>Cordia monoica</i> Roxb. (Boraginaceae)                                 | 13                 |
| <i>Psiadia punctulata</i> (DC.) Vatke (Asteraceae)                         | 12                 |
| <i>Prunus africana</i> (Hook.f.) Kalkman (Rosaceae)                        | 12                 |
| <i>Maesa lanceolata</i> Forssk. (Primulaceae)                              | 12                 |

|                                                                               |    |
|-------------------------------------------------------------------------------|----|
| <i>Leonotis nepetifolia</i> (L.) R.Br. (Lamiaceae)                            | 12 |
| <i>Commiphora africana</i> (A.Rich.) Endl. (Burseraceae)                      | 12 |
| <i>Aloe volkensii</i> Engl. (Xanthorrhoeaceae)                                | 12 |
| <i>Achyranthes aspera</i> L. (Amaranthaceae)                                  | 12 |
| <i>Ziziphus mucronata</i> Willd. (Rhamnaceae)                                 | 11 |
| <i>Sericocomopsis hildebrandtii</i> Schinz (Amaranthaceae)                    | 11 |
| <i>Searsia pyroides</i> (Burch.) Moffett (Anacardiaceae)                      | 11 |
| <i>Maerua triphylla</i> A. Rich. (Capparaceae)                                | 11 |
| <i>Leonotis ocymifolia</i> var. <i>raineriana</i> (Vis.) Iwarsson (Lamiaceae) | 11 |
| <i>Lantana trifolia</i> L. (Verbenaceae)                                      | 11 |
| <i>Grewia villosa</i> Willd. (Malvaceae)                                      | 11 |
| <i>Withania somnifera</i> (L.) Dunal (Solanaceae)                             | 10 |
| <i>Schrebera alata</i> (Hochst.) Welw. (Oleaceae)                             | 10 |
| <i>Hibiscus fuscus</i> Garcke (Malvaceae)                                     | 10 |
| <i>Gymnosporia heterophylla</i> (Eckl. & Zeyh.) Loes. (Celastraceae)          | 10 |
| <i>Gardenia ternifolia</i> Schumach. & Thonn. (Rubiaceae)                     | 10 |
| <i>Ficus sur</i> Forssk. (Moraceae)                                           | 10 |
| <i>Erythrina abyssinica</i> DC. (Leguminosae)                                 | 10 |
| <i>Croton dichogamus</i> Pax (Euphorbiaceae)                                  | 10 |
| <i>Boscia angustifolia</i> A.Rich. (Capparaceae)                              | 10 |
| <i>Balanites aegyptiaca</i> (L.) Delile (Zygophyllaceae)                      | 10 |
| <i>Acacia senegal</i> (L.) Willd. (Leguminosae)                               | 10 |
| <i>Acacia gerrardii</i> Benth. (Leguminosae)                                  | 10 |
| <i>Acacia brevispica</i> Harms (Leguminosae)                                  | 10 |
| <i>Ricinus communis</i> L. (Euphorbiaceae)                                    | 9  |
| <i>Osyris lanceolata</i> Hochst. & Steud. (Santalaceae)                       | 9  |
| <i>Ormocarpum trichocarpum</i> (Taub.) Engl. (Leguminosae)                    | 9  |
| <i>Olinia rochetiana</i> A.Juss. (Penaeaceae)                                 | 9  |
| <i>Ficus sycomorus</i> L. (Moraceae)                                          | 9  |
| <i>Euphorbia tirucalli</i> L. (Euphorbiaceae)                                 | 9  |
| <i>Senna didymobotrya</i> (Fresen.) H.S.Irwin & Barneby (Leguminosae)         | 9  |
| <i>Delonix elata</i> (L.) Gamble (Leguminosae)                                | 9  |
| <i>Clausena anisata</i> (Willd.) Hook.f. ex Benth. (Rutaceae)                 | 9  |
| <i>Aloe secundiflora</i> Engl. (Xanthorrhoeaceae)                             | 9  |
| <i>Turraea mombassana</i> C. DC. (Meliaceae)                                  | 8  |
| <i>Ocimum gratissimum</i> L. (Lamiaceae)                                      | 8  |
| <i>Microglossa pyrifolia</i> (Lam.) Kuntze (Asteraceae)                       | 8  |
| <i>Catha edulis</i> (Vahl) Endl. (Celastraceae)                               | 8  |
| <i>Acokanthera oppositifolia</i> (Lam.) Codd (Celastraceae)                   | 8  |
| <i>Vernonia brachycalyx</i> O.Hoffm. (Asteraceae)                             | 7  |
| <i>Cordia sinensis</i> Lam. (Boraginaceae)                                    | 7  |
| <i>Commelina benghalensis</i> L. (Commelinaceae)                              | 7  |
| <i>Cadaba farinosa</i> Forssk. (Capparaceae)                                  | 7  |
| <i>Balanites glabra</i> Mildbr. & Schltr. (Zygophyllaceae)                    | 7  |

|                                                                                               |   |
|-----------------------------------------------------------------------------------------------|---|
| <i>Albizia amara</i> (Roxb.) B.Boivin (Leguminosae)                                           | 7 |
| <i>Tetradenia riparia</i> (Hochst.) Codd (Lamiaceae)                                          | 6 |
| <i>Steganotaenia araliacea</i> Hochst. (Apiaceae)                                             | 6 |
| <i>Scutia myrtina</i> (Burm.f.) Kurz (Rhamnaceae)                                             | 6 |
| <i>Sclerocarya birrea</i> subsp. <i>caffra</i> (Sond.) Kokwaro (Anacardiaceae)                | 6 |
| <i>Phragmanthera usuiensis</i> (Oliv.) M.G.Gilbert (Loranthaceae)                             | 6 |
| <i>Kalanchoe glaucescens</i> Britten (Crassulaceae)                                           | 6 |
| <i>Hypericum revolutum</i> Vahl (Hypericaceae)                                                | 6 |
| <i>Dovyalis abyssinica</i> (A.Rich.) Warb. (Salicaceae)                                       | 6 |
| <i>Cynanchum viminale</i> (L.) L. (Apocynaceae)                                               | 6 |
| <i>Cissus quadrangularis</i> L. (Vitaceae)                                                    | 6 |
| <i>Blepharis stuhlmannii</i> Lindau (Acanthaceae)                                             | 6 |
| <i>Aneilema aequinoctiale</i> (P.Beauv.) Loudon (Commelinaceae)                               | 6 |
| <i>Adansonia digitata</i> L (Malvaceae)                                                       | 6 |
| <i>Solanum taitense</i> Vatke (Solanaceae)                                                    | 5 |
| <i>Solanum aculeastrum</i> Dunal (Solanaceae)                                                 | 5 |
| <i>Searsia tenuinervis</i> (Engl.) Moffett (Anacardiaceae)                                    | 5 |
| <i>Sclerocarya birrea</i> (A.Rich.) Hochst. (Anacardiaceae)                                   | 5 |
| <i>Pentas lanceolata</i> (Forssk.) Deflers (Rubiaceae)                                        | 5 |
| <i>Olea capensis</i> L. (Oleaceae)                                                            | 5 |
| <i>Melhania parvifolia</i> Chiov. (Malvaceae)                                                 | 5 |
| <i>Grewia tephrodermis</i> K. Schum. (Malvaceae)                                              | 5 |
| <i>Fuerstia africana</i> T.C.E.Fr. (Lamiaceae)                                                | 5 |
| <i>Cussonia holstii</i> Harms ex Engl. (Araliaceae)                                           | 5 |
| <i>Commiphora samharensis</i> subsp. <i>terebinthina</i> (Vollesen) J.B.Gillett (Burseraceae) | 5 |
| <i>Acokanthera schimperi</i> (A.DC.) Schweinf. (Apocynaceae)                                  | 5 |
| <i>Acacia seyal</i> Delile (Leguminosae)                                                      | 5 |
| <i>Acacia kirkii</i> Oliv. (Leguminosae)                                                      | 5 |
| <i>Acacia hockii</i> De Wild. (Leguminosae)                                                   | 5 |
| <i>Zanthoxylum chalybeum</i> Engl. (Rutaceae)                                                 | 4 |
| <i>Turraea robusta</i> Gürke (Meliaceae)                                                      | 4 |
| <i>Trimeria grandifolia</i> (Hochst.) Warb. (Salicaceae)                                      | 4 |
| <i>Strychnos henningsii</i> Gilg (Loganiaceae)                                                | 4 |
| <i>Senna italica</i> Mill. (Leguminosae)                                                      | 4 |
| <i>Sarcostemma stocksii</i> Hook. f. (Apocynaceae)                                            | 4 |
| <i>Rhoicissus tridentata</i> (L.f.) Wild & R.B.Drumm. (Vitaceae)                              | 4 |
| <i>Pittosporum viridiflorum</i> Sims (Pittosporaceae)                                         | 4 |
| <i>Ormocarpum kirkii</i> S.Moore (Leguminosae)                                                | 4 |
| <i>Lippia kituiensis</i> Vatke (Verbenaceae)                                                  | 4 |
| <i>Hydnora abyssinica</i> A.Br. (Hydnoraceae)                                                 | 4 |
| <i>Harrisonia abyssinica</i> Oliv. (Rutaceae)                                                 | 4 |
| <i>Gardenia volkensii</i> K.Schum.(Rubiaceae)                                                 | 4 |
| <i>Garcinia livingstonei</i> T.Anderson (Clusiaceae)                                          | 4 |
| <i>Garcinia dumosa</i> King (Clusiaceae)                                                      | 4 |

|                                                                                           |   |
|-------------------------------------------------------------------------------------------|---|
| <i>Ehretia cymosa</i> Thonn. (Boraginaceae)                                               | 4 |
| <i>Dombeya burgessiae</i> Gerrard ex Harv. (Malvaceae)                                    | 4 |
| <i>Croton megalocarpus</i> Hutch. (Euphorbiaceae)                                         | 4 |
| <i>Croton macrostachyus</i> Hochst. ex Delile (Euphorbiaceae)                             | 4 |
| <i>Cotyledon barbeyi</i> Schweinf. ex Baker (Crassulaceae)                                | 4 |
| <i>Commiphora schimperi</i> (O.Bergman) Engl. (Burseraceae)                               | 4 |
| <i>Boscia coriacea</i> Graells (Capparaceae)                                              | 4 |
| <i>Aspilia pluriseta</i> Schweinf. ex Schweinf. (Asteraceae)                              | 4 |
| <i>Acacia reficiens</i> subsp. <i>misera</i> (Vatke) Brenan (Leguminosae)                 | 4 |
| <i>Acacia ancistroclada</i> Brenan (Leguminosae)                                          | 4 |
| <i>Urtica massaica</i> Mildbr. (Urticaceae)                                               | 3 |
| <i>Talinum portulacifolium</i> (Forssk.) Asch. ex Schweinf. (Talinaceae)                  | 3 |
| <i>Sphaeranthus confertifolius</i> Robyns (Asteraceae)                                    | 3 |
| <i>Solanecio mannii</i> (Hook.f.) C.Jeffrey (Asteraceae)                                  | 3 |
| <i>Sida tenuicarpa</i> Vollesen (Malvaceae)                                               | 3 |
| <i>Senna didymobotrya</i> (Fresen.) H.S.Irwin & Barneby (Leguminosae)                     | 3 |
| <i>Rapanea melanophloeos</i> (L.) Mez (Primulaceae)                                       | 3 |
| <i>Phyllanthus urinaria</i> L. (Phyllanthaceae)                                           | 3 |
| <i>Ozoroa insignis</i> Delile (Anacardiaceae)                                             | 3 |
| <i>Opilia campestris</i> Engl. (Opiliaceae)                                               | 3 |
| <i>Olea europaea</i> subsp. <i>cuspidata</i> (Wall. & G.Don) Cif. (Oleaceae)              | 3 |
| <i>Maerua angolensis</i> DC. (Capparaceae)                                                | 3 |
| <i>Jasminum fluminense</i> Vell. (Oleaceae)                                               | 3 |
| <i>Heteromorpha trifoliata</i> (H.L.Wendl.) Eckl. & Zeyh. (Apiaceae)                      | 3 |
| <i>Helichrysum forskahlii</i> (J.F.Gmel.) Hilliard & B.L.Burt (Asteraceae)                | 3 |
| <i>Ficus thonningii</i> Blume (Moraceae)                                                  | 3 |
| <i>Euphorbia meridionalis</i> P.R.O.Bally & S.Carter (Euphorbiaceae)                      | 3 |
| <i>Euphorbia gossypina</i> Pax (Euphorbiaceae)                                            | 3 |
| <i>Euphorbia cuneata</i> Vahl (Euphorbiaceae)                                             | 3 |
| <i>Dombeya rotundifolia</i> (Hochst.) Planch. (Malvaceae)                                 | 3 |
| <i>Cyphostemma cyphopetalum</i> var. <i>nodiglandulosum</i> (T.C.E.Fr.) Verdc. (Vitaceae) | 3 |
| <i>Croton megalocarpoides</i> Friis & M.G.Gilbert (Euphorbiaceae)                         | 3 |
| <i>Commiphora campestris</i> Engl. (Burseraceae)                                          | 3 |
| <i>Cissus rotundifolia</i> Vahl (Vitaceae)                                                | 3 |
| <i>Cassine buchananii</i> Loes. (Celastraceae)                                            | 3 |
| <i>Albizia lebbeck</i> (L.) Benth. (Leguminosae)                                          | 3 |
| <i>Aerva lanata</i> (L.) Juss. (Amaranthaceae)                                            | 3 |
| <i>Acacia etbaica</i> Schweinf. (Leguminosae)                                             | 3 |
| <i>Acacia elatior</i> Brenan (Leguminosae)                                                | 3 |
| <i>Vernonia abbotiana</i> O.Hoffm. (Asteraceae)                                           | 2 |
| <i>Urtica dioica</i> L. (Urticaceae)                                                      | 2 |
| <i>Turraea abyssinica</i> Hochst. (Meliaceae)                                             | 2 |
| <i>Trimeria bakeri</i> Gilg (Salicaceae)                                                  | 2 |
| <i>Tinneo aethiopica</i> Kotschy ex Hook.f. (Lamiaceae)                                   | 2 |

|                                                                                               |   |
|-----------------------------------------------------------------------------------------------|---|
| <i>Tetradenia multiflora</i> (Benth.) Phillipson (Lamiaceae)                                  | 2 |
| <i>Syzygium cordatum</i> Hochst. ex Krauss (Myrtaceae)                                        | 2 |
| <i>Sporobolus stapfianus</i> Gand. (Poaceae)                                                  | 2 |
| <i>Solanum mauense</i> Bitter (Solanaceae)                                                    | 2 |
| <i>Solanecio angulatus</i> (Vahl) C.Jeffrey (Asteraceae)                                      | 2 |
| <i>Senna septemtrionalis</i> (Viv.) H.S.Irwin & Barneby (Leguminosae)                         | 2 |
| <i>Searsia natalensis</i> (Bernh. ex C.Krauss) F.A.Barkley (Anacardiaceae)                    | 2 |
| <i>Rumex usambarensis</i> (Dammer) Dammer (Polygonaceae)                                      | 2 |
| <i>Pyrenacantha malvifolia</i> Engl. (Icacinaceae)                                            | 2 |
| <i>Podocarpus latifolius</i> (Thunb.) R.Br. ex Mirb. (Podocarpaceae)                          | 2 |
| <i>Plantago major</i> L. (Plantaginaceae)                                                     | 2 |
| <i>Piper capense</i> L.f. (Piperaceae)                                                        | 2 |
| <i>Pavonia urens</i> Cav. (Malvaceae)                                                         | 2 |
| <i>Pavonia burchellii</i> (DC.) R.A.Dyer (Malvaceae)                                          | 2 |
| <i>Morella salicifolia</i> var. <i>kilimandscharica</i> (Engl.) Verdc. & Polhill (Myricaceae) | 2 |
| <i>Mondia whitei</i> (Hook.f.) Skeels (Apocynaceae)                                           | 2 |
| <i>Lycium europaeum</i> L. (Solanaceae)                                                       | 2 |
| <i>Leucas tomentosa</i> Gürke (Lamiaceae)                                                     | 2 |
| <i>Leucas jamesii</i> Baker (Lamiaceae)                                                       | 2 |
| <i>Justicia odora</i> (Forssk.) Lam. (Acanthaceae)                                            | 2 |
| <i>Ipomoea jaegeri</i> Pilg. (Convolvulaceae)                                                 | 2 |
| <i>Indigofera erecta</i> Thunb. (Leguminosae)                                                 | 2 |
| <i>Gutenbergia cordifolia</i> Benth. ex Oliv. (Asteraceae)                                    | 2 |
| <i>Galium aparinoides</i> Forssk. (Rubiaceae)                                                 | 2 |
| <i>Faurea saligna</i> Harv. (Proteaceae)                                                      | 2 |
| <i>Embelia schimperi</i> Vatke (Primulaceae)                                                  | 2 |
| <i>Dombeya torrida</i> (J.F.Gmel.) Bamps (Malvaceae)                                          | 2 |
| <i>Cucumis ficifolius</i> A.Rich. (Cucurbitaceae)                                             | 2 |
| <i>Croton dichogamus</i> Pax (Euphorbiaceae)                                                  | 2 |
| <i>Croton zambalensis</i> Merr. (Euphorbiaceae)                                               | 2 |
| <i>Craterostigma plantagineum</i> Hochst. (Linderniaceae)                                     | 2 |
| <i>Commelina africana</i> L. (Commelinaceae)                                                  | 2 |
| <i>Chloris virgata</i> Sw. (Poaceae)                                                          | 2 |
| <i>Cassine aethiopica</i> Thunb. (Celastraceae)                                               | 2 |
| <i>Calodendrum capense</i> (L.f.) Thunb. (Rutaceae)                                           | 2 |
| <i>Buddleja polystachya</i> Fresen. (Scrophulariaceae)                                        | 2 |
| <i>Blepharis linariifolia</i> Pers. (Acanthaceae)                                             | 2 |
| <i>Bauhinia thonningii</i> Schum. (Leguminosae)                                               | 2 |
| <i>Azadirachta indica</i> A. Juss. (Meliaceae)                                                | 2 |
| <i>Aspilia mossambicensis</i> (Oliv.) Wild (Asteraceae)                                       | 2 |
| <i>Albizia berteriana</i> (DC.) Fawc. & Rendle (Leguminosae)                                  | 2 |
| <i>Acacia robusta</i> Burch. (Leguminosae)                                                    | 2 |
| <i>Acacia lahai</i> Benth. (Leguminosae)                                                      | 2 |
| <i>Abutilon longicuspe</i> Hochst. ex A.Rich. (Malvaceae)                                     | 2 |
| <i>Zehneria scabra</i> Sond. (Cucurbitaceae)                                                  | 1 |

|                                                                     |   |
|---------------------------------------------------------------------|---|
| <i>Ximenia caffra</i> Sond. (Olacaceae)                             | 1 |
| <i>Viscum tuberculatum</i> A.Rich. (Santalaceae)                    | 1 |
| <i>Vernonia brachycalyx</i> O.Hoffm (Asteraceae)                    | 1 |
| <i>Vernonia auriculifera</i> Hiern (Asteraceae)                     | 1 |
| <i>Vangueria madagascariensis</i> J.F.Gmel. (Rubiaceae)             | 1 |
| <i>Vangueria infausta</i> Burch. (Rubiaceae)                        | 1 |
| <i>Tripteris vaillantii</i> Decne. (Asteraceae)                     | 1 |
| <i>Thunbergia fischeri</i> Engl. (Acanthaceae)                      | 1 |
| <i>Terminalia brownii</i> Fresen. (Combretaceae)                    | 1 |
| <i>Sphaeranthus suaveolens</i> (Forssk.) DC. (Asteraceae)           | 1 |
| <i>Schinus molle</i> L. (Anacardiaceae)                             | 1 |
| <i>Sansevieria volkensis</i> Gürke (Asparagaceae)                   | 1 |
| <i>Sansevieria suffruticosa</i> N.E.Br. (Asparagaceae)              | 1 |
| <i>Rubus steudneri</i> Schweinf. (Rosaceae)                         | 1 |
| <i>Rhynchosia calycosa</i> Hemsl. (Leguminosae)                     | 1 |
| <i>Rhoicissus erythroides</i> (Fresen.) Planch. (Vitaceae)          | 1 |
| <i>Ranunculus oreophytus</i> Delile (Ranunculaceae)                 | 1 |
| <i>Quercus rotundifolia</i> Lam. (Fagaceae)                         | 1 |
| <i>Pterolobium stellatum</i> (Forssk.) Brenan (Leguminosae)         | 1 |
| <i>Protea gagedi</i> J.F.Gmel. (Proteaceae)                         | 1 |
| <i>Plumbago zeylanica</i> L. (Plumbaginaceae)                       | 1 |
| <i>Plantago palmata</i> Hook.f. (Plantaginaceae)                    | 1 |
| <i>Persicaria setosula</i> (A.Rich.) K.L.Wilson (Polygonaceae)      | 1 |
| <i>Olinia usambarensis</i> Gilg ex Engl. (Penaeaceae)               | 1 |
| <i>Oldenlandia monanthos</i> (Hochst. ex A.Rich.) Hiern (Rubiaceae) | 1 |
| <i>Musa acuminata</i> Colla (Musaceae)                              | 1 |
| <i>Leucas calostachys</i> Oliv. (Lamiaceae)                         | 1 |
| <i>Leonotis ocymifolia</i> (Burm.f.) Iwarsson (Lamiaceae)           | 1 |
| <i>Laphangium luteoalbum</i> (L.) Tzvelev (Asteraceae)              | 1 |
| <i>Kalanchoe densiflora</i> Rolfe (Crassulaceae)                    | 1 |
| <i>Jasminum abyssinicum</i> Hochst. ex DC. (Oleaceae)               | 1 |
| <i>Indigofera arrecta</i> A.Rich. (Leguminosae)                     | 1 |
| <i>Hymenodictyon parvifolium</i> Oliv. (Rubiaceae)                  | 1 |
| <i>Hoslundia opposita</i> Vahl (Lamiaceae)                          | 1 |
| <i>Hirpicium diffusum</i> (O.Hoffm.) Roessler (Asteraceae)          | 1 |
| <i>Helinus mystacinus</i> (Aiton) E.Mey. ex Steud. (Rhamnaceae)     | 1 |
| <i>Gymnosporia senegalensis</i> (Lam.) Loes. (Celastraceae)         | 1 |
| <i>Gutenbergia rueppellii</i> Sch.Bip. (Asteraceae)                 | 1 |
| <i>Grewia similis</i> K.Schum. (Malvaceae)                          | 1 |
| <i>Flacourtia indica</i> (Burm.f.) Merr. (Salicaceae)               | 1 |
| <i>Euryops jacksonii</i> S.Moore (Asteraceae)                       | 1 |
| <i>Euphorbia uhligiana</i> Pax (Euphorbiaceae)                      | 1 |
| <i>Euphorbia robecchii</i> Pax (Euphorbiaceae)                      | 1 |
| <i>Euclea racemosa</i> L. (Ebenaceae)                               | 1 |

|                                                                                 |   |
|---------------------------------------------------------------------------------|---|
| <i>Ekebergia capensis</i> Sparrm. (Meliaceae)                                   | 1 |
| <i>Echinops sphaerocephalus</i> L. (Asteraceae)                                 | 1 |
| <i>Dregea schimperi</i> (Decne.) Bullock (Apocynaceae)                          | 1 |
| <i>Dombeya kirkii</i> Mast. (Malvaceae)                                         | 1 |
| <i>Diospyros abyssinica</i> (Hiern) F.White (Ebenaceae)                         | 1 |
| <i>Cyphostemma serpens</i> (Hochst. ex A.Rich.) Desc. (Vitaceae)                | 1 |
| <i>Cyphostemma cyphopetalum</i> (Fresen.) Desc. ex Wild & R.B.Drumm. (Vitaceae) | 1 |
| <i>Cynanchum altiscandens</i> K.Schum. (Apocynaceae)                            | 1 |
| <i>Cussonia spicata</i> Thunb. (Araliaceae)                                     | 1 |
| <i>Crotalaria rotundifolia</i> J.F.Gmel. (Leguminosae)                          | 1 |
| <i>Crotalaria agatiflora</i> Schweinf. (Leguminosae)                            | 1 |
| <i>Crepis carbonaria</i> Sch.Bip. (Asteraceae)                                  | 1 |
| <i>Cordia africana</i> Lam. (Boraginaceae)                                      | 1 |
| <i>Commiphora swynnertonii</i> Burt (Burseraceae)                               | 1 |
| <i>Clutia abyssinica</i> Jaub. & Spach (Peraceae)                               | 1 |
| <i>Clerodendrum rotundifolium</i> Oliv. (Lamiaceae)                             | 1 |
| <i>Clematis brachiata</i> Thunb. (Ranunculaceae)                                | 1 |
| <i>Centrapalus pauciflorus</i> (Willd.) H.Rob. (Asteraceae)                     | 1 |
| <i>Cassipourea malosana</i> (Baker) Alston (Rhizophoraceae)                     | 1 |
| <i>Capparis tomentosa</i> Lam. (Capparaceae)                                    | 1 |
| <i>Capparis fascicularis</i> DC. (Capparaceae)                                  | 1 |
| <i>Cajanus cajan</i> (L.) Millsp. (Leguminosae)                                 | 1 |
| <i>Baccharoides adoensis</i> (Sch.Bip. ex Walp.) H.Rob. (Asteraceae)            | 1 |
| <i>Asparagus africanus</i> Lam. (Asparagaceae)                                  | 1 |
| <i>Apodytes dimidiata</i> E.Mey. ex Arn. (Icacinaceae)                          | 1 |
| <i>Anthriscus sylvestris</i> (L.) Hoffm. (Apiaceae)                             | 1 |
| <i>Aneilema spekei</i> C.B.Clarke (Commelinaceae)                               | 1 |
| <i>Aloe vera</i> (L.) Burm.f. (Xanthorrhoeaceae)                                | 1 |
| <i>Afrocarpus falcatus</i> (Thunb.) C.N.Page (Podocarpaceae)                    | 1 |
| <i>Acacia sieberiana</i> DC. (Leguminosae)                                      | 1 |
| <i>Acacia ericifolia</i> Benth. (Leguminosae)                                   | 1 |
